# Supplementary material for: Unsymmetrical one-electron oxidized Ni(ii)–bis(salicylidene) complexes: a protonation-induced shift of the oxidation site
Source: Royal Society of Chemistry journal article supplement (doi:10.1039/c0cc01775b), 2010-01-01

Electronic Supplementary Information for

**Unsymmetrical one-electron oxidized Ni(II)-  
bis(salicylidene) complexes: A protonation-induced  
shift of the oxidation site.**

Amélie Kochem, Maylis Orio, Olivier Jarjayes, Frank Neese, Fabrice Thomas

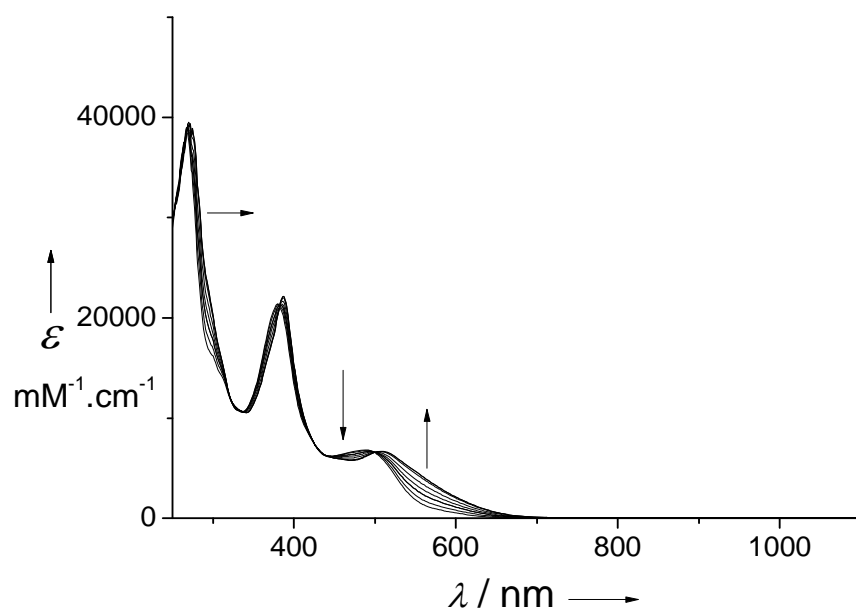

**Fig S1.** Titration of  $2\text{H}^+$  (0.05 mM in  $\text{CH}_2\text{Cl}_2$ ) by 0 to one molar equivalent of  $\text{NEt}_3$  (2.5 mM). Arrows indicate spectral changes when  $\text{NEt}_3$  is added.  $T = 298 \text{ K}$ ,  $l = 1.000 \text{ cm}$ .

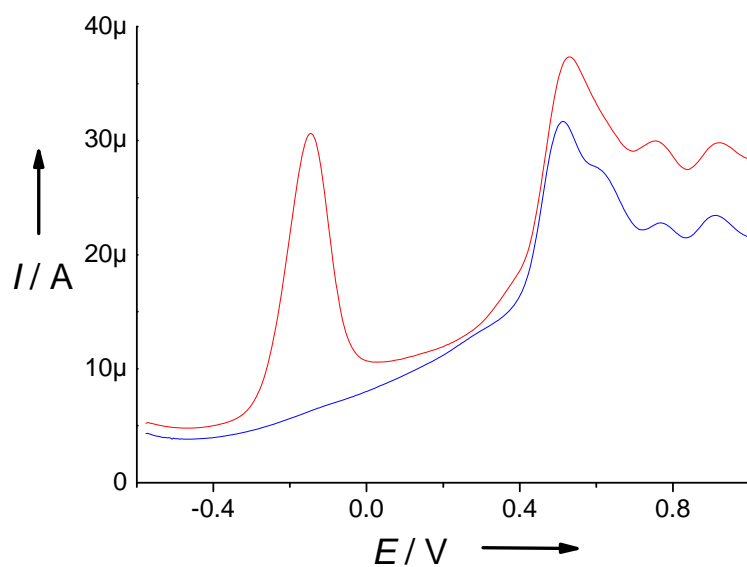

**Fig. S2** Differential pulse voltammogram recorded for 1 mM  $CH_2Cl_2$  (+ 0.1 M TBAP) solutions of  $2H^+$  (blue) and  $2$  (red). The potential values are given versus the  $Fc/Fc^+$  couple.  $T = 298$  K, pulse amp. 0.05 V.

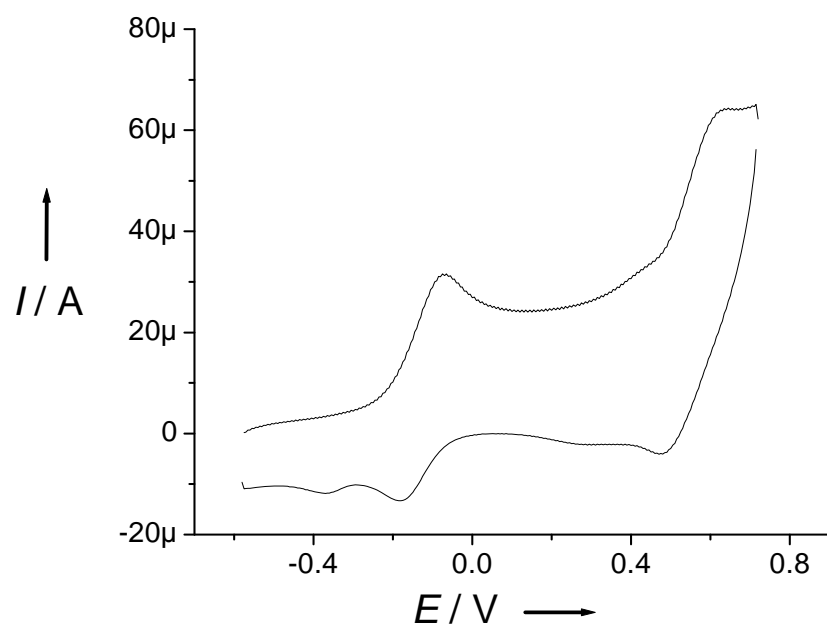

**Fig. S3** Cyclic voltammetry curves of a 1 mM  $CH_2Cl_2$  solution (+ 0.1 M TBAP) of complex  $2$ . Scan rate:  $0.1$  V  $s^{-1}$ ,  $T = 298$  K. The potentials are referenced versus the  $Fc/Fc^+$  couple.

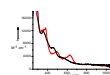

**Fig S4.** UV-Vis spectra of  $(2\bullet)^+$  (red) and  $(2H\bullet)^{2+}$  (black) in  $CH_2Cl_2$  (+0.005 M TBAP).  $T = 243$  K,  $l = 1.000$  cm.

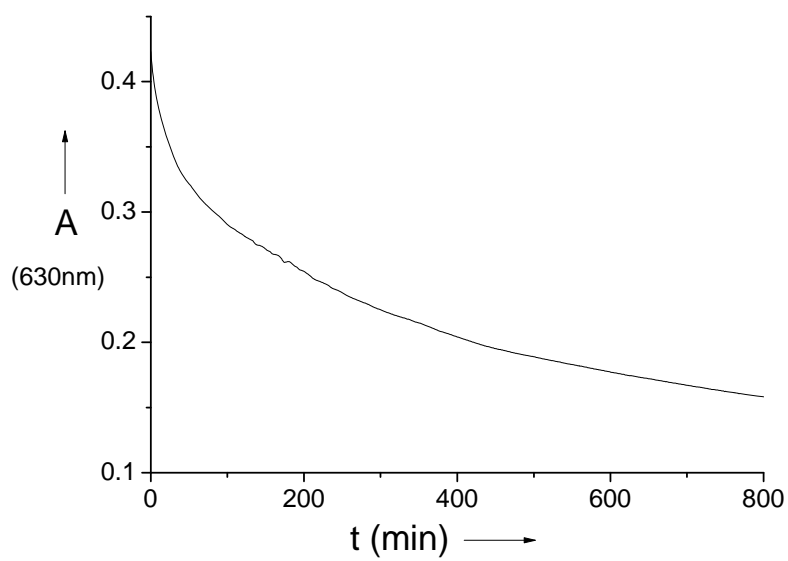

**Fig S5.** Decay pattern of  $(2\bullet)^+$  in  $CH_2Cl_2$  at 298 K,  $l = 1.000$  cm.

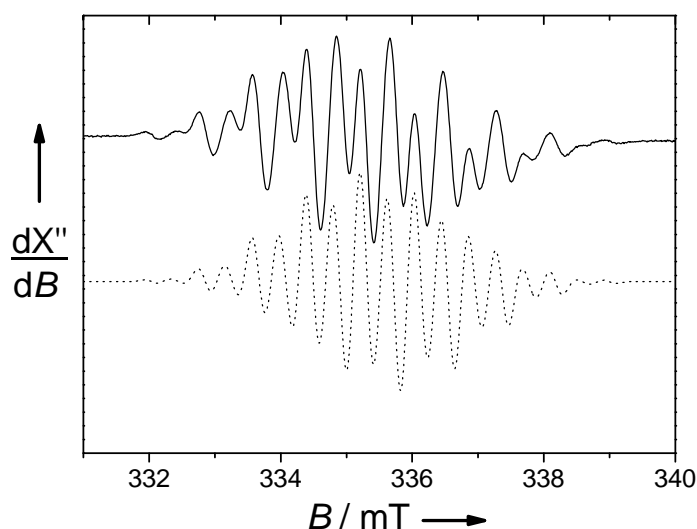

**Fig S6.** Isotropic X-Band EPR spectra of a 1 mM  $\text{CH}_2\text{Cl}_2$  solution (containing 0.1 M TBAP) of  $(2')^+$ . Solid lines is experimental spectrum, dotted lines a simulation using the parameters given in the text.  $T = 223$  K, microwave frequency 9.42 GHz, power 20 mW, modulation frequency 100 KHz, amplitude 0.1 mT.

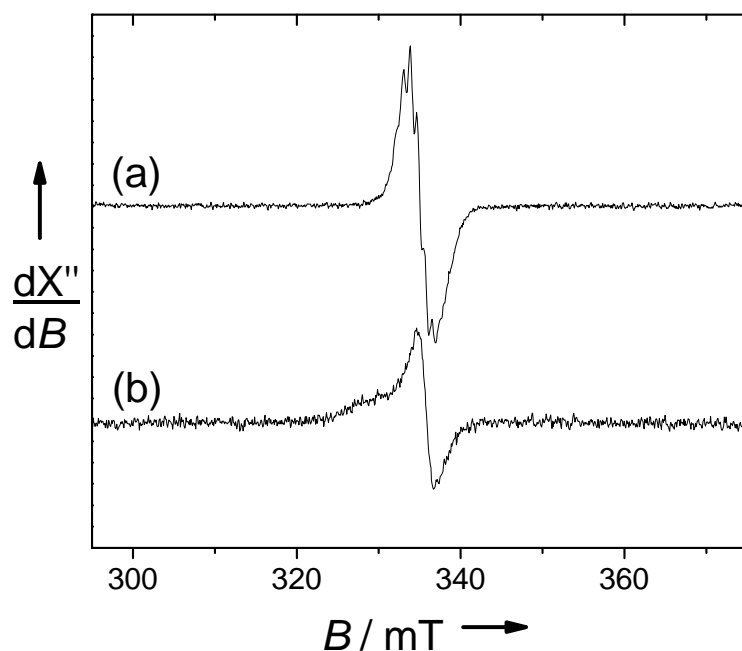

**Fig. S7** X-Band EPR spectra of 0.5 mM  $\text{CH}_2\text{Cl}_2$  solutions (containing 0.1 M TBAP) of  $(2')^+$  (a) and  $(2')^+$  in the presence of three equivalents of  $\text{HClO}_4$  (b, spectrum multiplied by a three factor). \*  $T = 100$  K, microwave frequency 9.42 GHz, power 20 mW, modulation frequency 100 KHz, amplitude 0.4 mT.

\*: In the presence of three equivalents of  $\text{HClO}_4$  protonation is not fully achieved, likely due to the enhanced acidity of the dimethylaminophenoxyl radical moiety with respect to the dimethylaminophenolate. Under these conditions the EPR signal is less intense, suggesting some decomposition promoted by the excess of acid.

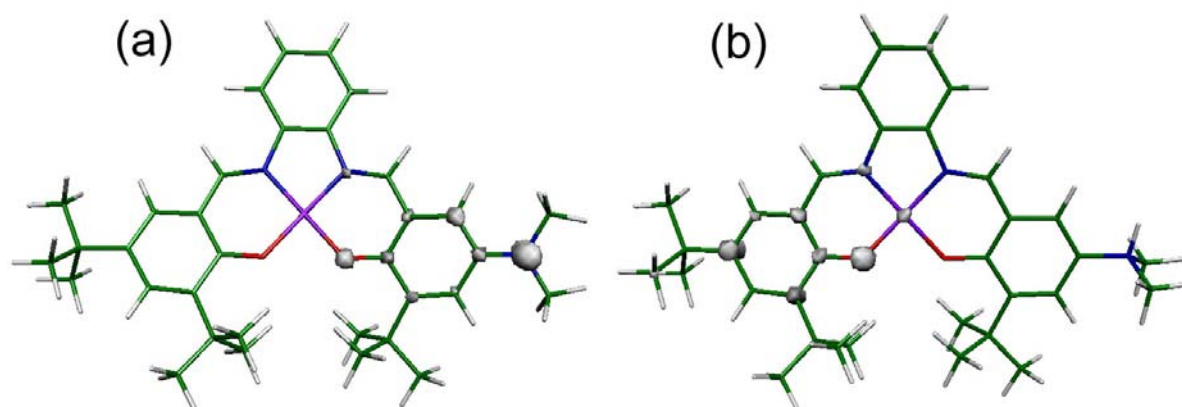

**Fig S8.** Spin density plots for  $(2')^+$  (a) and  $(2H')^{2+}$  (b).

**Table S1.** Computed nitrogen and proton hyperfine coupling constants (MHz) for  $(2')^+$  \*

|                  | N33   | H42    | H43   | H76   | H77   | H78   | H81   | H82   | H83   |
|------------------|-------|--------|-------|-------|-------|-------|-------|-------|-------|
| A <sub>1</sub>   | -0.42 | -3.95  | 1.49  | -1.29 | 30.84 | 34.57 | -1.31 | 35.50 | 37.35 |
| A <sub>2</sub>   | -0.55 | -14.02 | -2.07 | -1.56 | 32.43 | 35.93 | -1.67 | 36.43 | 38.27 |
| A <sub>3</sub>   | 50.56 | -17.34 | -3.62 | 5.61  | 37.86 | 41.46 | 5.53  | 42.41 | 44.21 |
| A <sub>iso</sub> | 16.53 | -11.77 | -1.40 | 0.92  | 33.71 | 37.32 | 0.85  | 38.11 | 39.94 |

\* Note that our calculations highlight the non-equivalence of the protons of the  $N(CH_3)_2$  group. On one hand, we observe that H76 and H81 have an almost zero value due to their specific in-plane orientation with respect to the phenoxy ring. On the other hand, {H77,H78} and {H82, H83} both feature an angle of 60 degrees with the phenoxy ring, which is in line with larger hyperfine coupling constants. Since the experimental A values were obtained by simulation of an isotropic EPR spectrum (free rotation of the methyl groups of the N-dimethylamino substituent), a better comparison could be made by using the averaged value A<sub>iso</sub> of the computed hyperfine couplings of {H76, H77, H78, H81, H82, H83}, which is 25.14 MHz.

The following labelling is used (where (a) denotes  $(2')^+$  and (b)  $(2H')^{2+}$ ):

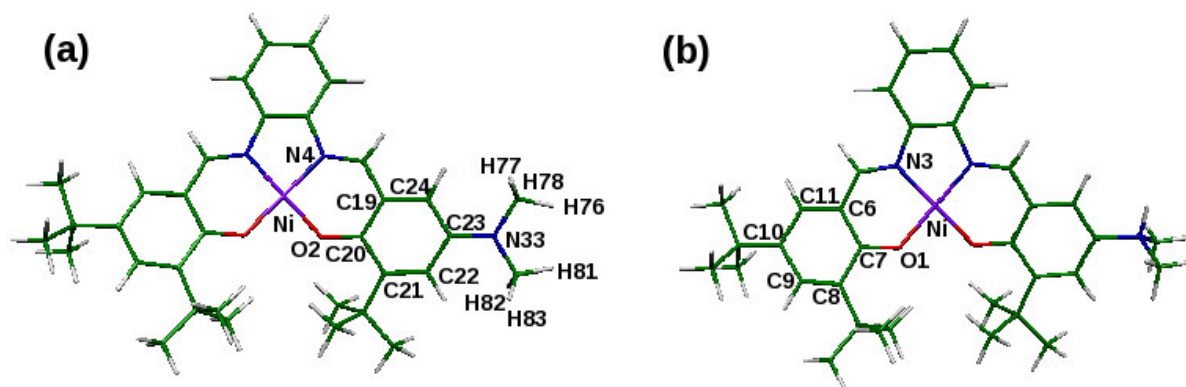

Supplement: c0cc01775b.pdf [file c0cc01775b.pdf]
